# Supplementary material for: Sulfoxidation on a SiO2-supported Ru complex using O2/aldehyde system
Source: Royal Society of Chemistry journal article supplement (doi:10.1039/c2dt12133f), 2012-01-01
Supplement: c2dt12133f.pdf [file c2dt12133f.pdf]

## Electronic Supplementary Information (ESI) 1

### Synthesis of Ru complex (B)<sup>7, 66</sup>

#### Preparation of H<sub>2</sub>NCH<sub>2</sub>CH<sub>2</sub>NHSO<sub>2</sub>C<sub>8</sub>H<sub>7</sub>

A CH<sub>2</sub>Cl<sub>2</sub> solution (15 mL) of 4-vinylbenzenesulfonyl chloride (5 mL) was dropped into 5 mL of ethylene diamine dissolved in 10 mL of CH<sub>2</sub>Cl<sub>2</sub>, and the mixture was stirred for 3 h. CH<sub>2</sub>Cl<sub>2</sub> (200 mL), H<sub>2</sub>O (100 mL), and HCl/ H<sub>2</sub>O (2 M, 200 mL) were added to the solution, and the water layer was washed with CH<sub>2</sub>Cl<sub>2</sub> twice. After filtration, the water layer was neutralized by KOH solution (2 M, pH 9-10) and extracted with 150 mL of CH<sub>2</sub>Cl<sub>2</sub> three times. The organic layers were dried with Na<sub>2</sub>SO<sub>4</sub>, and filtrated, and the solvents were evaporated. <sup>1</sup>H NMR (400 MHz, CDCl<sub>3</sub>, 298 K): δ in ppm = 2.80 (m, 2H; CH<sub>2</sub>), 2.97 (m, 2H; CH<sub>2</sub>), 5.43 (d, 1H; CH=CH<sub>2</sub>), 5.87 (d, 1H; CH=CH<sub>2</sub>), 6.75 (dd, 2H; CH=CH<sub>2</sub>), 7.52 (d, 2H; C<sub>6</sub>H<sub>4</sub>), 7.82 (d, 2H; C<sub>6</sub>H<sub>4</sub>). <sup>13</sup>C NMR (101 MHz, CDCl<sub>3</sub>, 298 K): δ in ppm = 40.92, 45.40 (NCH<sub>2</sub>), 117.33, 126.76, 127.38, 135.36, 138.76, 141.74 (C<sub>6</sub>H<sub>4</sub>-CH=CH<sub>2</sub>).

#### Synthesis of Ru precursor [(*p*-cymene)Ru{H<sub>2</sub>NCH<sub>2</sub>CH<sub>2</sub>NSO<sub>2</sub>C<sub>8</sub>H<sub>7</sub>}Cl]

H<sub>2</sub>NCH<sub>2</sub>CH<sub>2</sub>NHSO<sub>2</sub>C<sub>8</sub>H<sub>7</sub> (226 mg, 1 mmol) dissolved in CH<sub>2</sub>Cl<sub>2</sub>/CH<sub>3</sub>OH (1/1, 15 mL) and NaOCH<sub>3</sub> (1 mmol) in CH<sub>3</sub>OH (0.5 mL) were slowly added to a CH<sub>2</sub>Cl<sub>2</sub> solution (20 mL) of Ru<sub>2</sub>(*p*-cymene)<sub>2</sub>Cl<sub>4</sub> (306 mg, 0.5 mmol). The mixture was stirred for 3 h under N<sub>2</sub> atmosphere, and then the solvent was evaporated. The residue was dissolved in CH<sub>2</sub>Cl<sub>2</sub>/Et<sub>2</sub>O (2/1, 30 mL), and after filtration the solution was reduced to 2 mL under vacuum. *n*-Hexane (15 mL) was added, and the precipitate was dried under vacuum. <sup>1</sup>H NMR (400 MHz, CDCl<sub>3</sub>/CD<sub>3</sub>OD, 4:1, 298 K): δ in ppm = 1.26 (d, 6H; CH(CH<sub>3</sub>)<sub>2</sub>), 2.15 (s, 3H; CH<sub>3</sub>, (*p*-cymene)), 2.30 (brd, 4H; NCH<sub>2</sub>), 2.83 (sept, 1H; CH(CH<sub>3</sub>)<sub>2</sub>), 5.29 (d, 1H; CH=CH<sub>2</sub>), 5.47 (brd, 2H; CH (*p*-cymene)), 5.62 (d, 2H; CH (*p*-cymene)), 5.79 (d, 1H; CH=CH<sub>2</sub>), 6.70 (dd, 1H; CH=CH<sub>2</sub>), 7.40 (d, 2H; C<sub>6</sub>H<sub>4</sub>), 7.81 (d, 2H; C<sub>6</sub>H<sub>4</sub>). <sup>13</sup>C NMR (101 MHz, CDCl<sub>3</sub>/CD<sub>3</sub>OD, 4:1, 298 K): δ in ppm = 18.56, 22.53 (CH<sub>3</sub>, *p*-cymene), 30.76 (CH, *p*-cymene), 47.11, 47.37 (NCH<sub>2</sub>), 81.29 (CH, *p*-cymene), 96.66, 102.46 (C, *p*-cymene), 115.57, 126.08, 127.75, 136.24, 139.88, 142.46 (C<sub>6</sub>H<sub>4</sub>-CH=CH<sub>2</sub>).

### Synthesis of sulfoxides and sulfones

#### General procedure for the synthesis of sulfoxides and sulfones

To a solution of 2 g of organic sulfide in CH<sub>2</sub>Cl<sub>2</sub> (20 mL), *m*-CPBA (1 and 2 equivalent for the synthesis of sulfoxide and sulfone, respectively) in CH<sub>2</sub>Cl<sub>2</sub> (20 mL and 30 mL, respectively) was added slowly at 273 K. After stirring for 3 h at 273 K, an aqueous saturated NaHCO<sub>3</sub>

solution (10 mL) was added to quench the reaction mixture. It was stirred for another 1 h at room temperature. The aqueous part was separated and extracted with CH<sub>2</sub>Cl<sub>2</sub> (20 mL) two times. The combined organic parts were washed with water (50 mL), brine (20 mL × 2) and dried over MgSO<sub>4</sub>. The crude compound was purified by silica gel column chromatography.

**4-Chlorophenyl methyl sulfoxide** Eluent: EtOAc; yield: 73 %; <sup>1</sup>H NMR (400 MHz, CDCl<sub>3</sub>, 298 K): δ in ppm = 2.72 (s, 3H; CH<sub>3</sub>), 7.50 (dd, 2H; C<sub>6</sub>H<sub>4</sub>), 7.59 (dd, 2H; C<sub>6</sub>H<sub>4</sub>). <sup>13</sup>C NMR (101 MHz, CDCl<sub>3</sub>, 298 K): δ in ppm = 44.04, 124.96, 129.62, 137.17, 144.26.

**4-Fluorophenyl methyl sulfoxide** Eluent: EtOAc; yield: 76 %; <sup>1</sup>H NMR (400 MHz, CDCl<sub>3</sub>, 298 K): δ in ppm = 2.72 (d, 3H; CH<sub>3</sub>), 7.23 (m, 2H; C<sub>6</sub>H<sub>4</sub>), 7.66 (m, 2H; C<sub>6</sub>H<sub>4</sub>). <sup>13</sup>C NMR (101 MHz, CDCl<sub>3</sub>, 298 K): δ in ppm = 44.17, 116.57, 116.80, 125.80, 125.89, 141.16, 141.20, 163.05, 165.55.

**Phenyl *p*-tolyl sulfoxide** Eluent: hexane/EtOAc (6/4); yield: 86 %; <sup>1</sup>H NMR (400 MHz, CDCl<sub>3</sub>, 298 K): δ in ppm = 2.36 (s, 3H; CH<sub>3</sub>), 7.25 (d, 2H; Ar), 7.44 (m, 3H; Ar), 7.53 (d, 2H; Ar), 7.62 (m, 2H; Ar). <sup>13</sup>C NMR (101 MHz, CDCl<sub>3</sub>, 298 K): δ in ppm = 21.40, 124.69, 124.99, 129.25, 130.02, 130.86, 141.63, 142.49, 145.82.

**Phenyl *p*-tolyl sulfone** Eluent: hexane/EtOAc (6/4); yield: 82 %; <sup>1</sup>H NMR (400 MHz, CDCl<sub>3</sub>, 298 K): δ in ppm = 2.39 (s, 3H; CH<sub>3</sub>), 7.29 (d, 2H; Ar), 7.51 (m, 3H; Ar), 7.82 (d, 2H; Ar), 7.93 (d, 2H; Ar). <sup>13</sup>C NMR (101 MHz, CDCl<sub>3</sub>, 298 K): δ in ppm = 21.56, 127.50, 127.72, 129.21, 129.91, 132.99, 138.65, 141.99, 144.15.

**Benzyl methyl sulfoxide** Eluent: EtOAc; yield: 84 %; <sup>1</sup>H NMR (400 MHz, CDCl<sub>3</sub>, 298 K): δ in ppm = 2.45 (s, 3H; CH<sub>3</sub>), 3.92 (d, 1H; CH<sub>2</sub>), 4.05 (d, 1H; CH<sub>2</sub>), 7.28-7.40 (m, 5H; C<sub>6</sub>H<sub>5</sub>). <sup>13</sup>C NMR (101 MHz, CDCl<sub>3</sub>, 298 K): δ in ppm = 37.28, 60.30, 128.44, 128.98, 129.66, 130.02.

**Allyl phenyl sulfoxide** Eluent: hexane/EtOAc (4/6); yield: 96 %; <sup>1</sup>H NMR (400 MHz, CDCl<sub>3</sub>, 298 K): δ in ppm = 3.55 (m, 2H; CH<sub>2</sub>), 5.20 (d, 1H; CH=CH<sub>2</sub>), 5.33 (d, 1H; CH=CH<sub>2</sub>), 5.65 (m, 1H; CH=CH<sub>2</sub>), 7.48-7.62 (m, 5H; C<sub>6</sub>H<sub>5</sub>). <sup>13</sup>C NMR (101 MHz, CDCl<sub>3</sub>, 298 K): δ in ppm = 60.83, 123.92, 124.36, 125.21, 129.05, 131.13, 142.83.

## Electronic Supplementary Information (ESI) 2

### GC analysis

Table SI 1 Detail of GC analysis

| Column temperature programming                                                                                                                                                        | Carrier gas                    | Compound                                   | Retention time /min |
|---------------------------------------------------------------------------------------------------------------------------------------------------------------------------------------|--------------------------------|--------------------------------------------|---------------------|
| Column initial temp.: 323 K<br>Holding time: 3 min<br>Rate of heating: 15 K/min<br>Final temp.: 473 K<br>Final holding time: 5 min<br>Injection temp.: 523 K<br>Detector temp.: 523 K | He<br>Inlet press.:<br>100 kPa | Methyl phenyl sulfide (MPS)                | 10.6                |
|                                                                                                                                                                                       |                                | Methyl phenyl sulfoxide (MPSO)             | 13.5                |
|                                                                                                                                                                                       |                                | Methyl phenyl sulfone (MPSO <sub>2</sub> ) | 14.2                |
|                                                                                                                                                                                       |                                | Dodecane                                   | 11.8                |
|                                                                                                                                                                                       |                                | EtOAc                                      | 3.3                 |
|                                                                                                                                                                                       |                                | IBA                                        | 2.7                 |
|                                                                                                                                                                                       |                                | Propanal                                   | 2.4                 |
|                                                                                                                                                                                       |                                | 1-hexanal                                  | 6.4                 |
|                                                                                                                                                                                       |                                | <i>n</i> -butanal                          | 3.3                 |
|                                                                                                                                                                                       |                                | Benzaldehyde                               | 9.2                 |
| Column initial temp.: 323 K<br>Holding time: 3 min<br>Rate of heating: 10 K/min<br>Final temp.: 503 K<br>Final holding time: 3 min<br>Injection temp.: 573 K<br>Detector temp.: 573 K | He<br>Inlet press.:<br>100 kPa | 4-Fluorothioanisole                        | 12.1                |
|                                                                                                                                                                                       |                                | 4-Fluorophenyl methyl sulfoxide            | 16.2                |
|                                                                                                                                                                                       |                                | 4-Fluorophenyl methyl sulfone              | 17.0                |
|                                                                                                                                                                                       |                                | IBA                                        | 2.7                 |
|                                                                                                                                                                                       |                                | Dodecane                                   | 14.2                |
|                                                                                                                                                                                       |                                | EtOAc                                      | 3.3                 |
|                                                                                                                                                                                       |                                |                                            |                     |
| Column initial temp.: 323 K<br>Holding time: 3 min<br>Rate of heating: 10 K/min<br>Final temp.: 503 K<br>Final holding time: 5 min<br>Injection temp.: 523 K<br>Detector temp.: 523 K | He<br>Inlet press.:<br>130 kPa | 4-Chlorothioanisole                        | 14.7                |
|                                                                                                                                                                                       |                                | 4-Chlorophenyl methyl sulfoxide            | 18.1                |
|                                                                                                                                                                                       |                                | 4-Chlorophenyl methyl sulfone              | 18.7                |
|                                                                                                                                                                                       |                                | IBA                                        | 2.2                 |
|                                                                                                                                                                                       |                                | Dodecane                                   | 13.3                |
|                                                                                                                                                                                       |                                | EtOAc                                      | 2.9                 |
|                                                                                                                                                                                       |                                |                                            |                     |
| Column initial temp.: 323 K<br>Holding time: 3 min<br>Rate of heating: 10 K/min<br>Final temp.: 503 K<br>Final holding time: 5 min<br>Injection temp.: 523 K<br>Detector temp.: 523 K | He<br>Inlet press.:<br>130 kPa | Allyl phenyl sulfide                       | 13.6                |
|                                                                                                                                                                                       |                                | Allyl phenyl sulfoxide                     | 17.5                |
|                                                                                                                                                                                       |                                | Allyl phenyl sulfone                       | 18.2                |
|                                                                                                                                                                                       |                                | IBA                                        | 2.1                 |
|                                                                                                                                                                                       |                                | Dodecane                                   | 13.2                |
|                                                                                                                                                                                       |                                | EtOAc                                      | 2.5                 |
|                                                                                                                                                                                       |                                |                                            |                     |

|                                                                                                                                                                                        |                                |                                                                                                                                  |                                            |
|----------------------------------------------------------------------------------------------------------------------------------------------------------------------------------------|--------------------------------|----------------------------------------------------------------------------------------------------------------------------------|--------------------------------------------|
| Column initial temp.: 323 K<br>Holding time: 3 min<br>Rate of heating: 10 K/min<br>Final temp.: 473 K<br>Final holding time: 10 min<br>Injection temp.: 523 K<br>Detector temp.: 523 K | He<br>Inlet press.:<br>130 kPa | Benzyl methyl sulfide<br>Benzyl methyl sulfoxide<br>Benzyl methyl sulfone<br>IBA<br>Dodecane<br>EtOAc                            | 12.8<br>17.6<br>18.2<br>1.9<br>13.2<br>2.1 |
| Column initial temp.: 323 K<br>Holding time: 3 min<br>Rate of heating: 15 K/min<br>Final temp.: 473 K<br>Final holding time: 5 min<br>Injection temp.: 523 K<br>Detector temp.: 523 K  | He<br>Inlet press.:<br>100 kPa | Dibutyl sulfide<br>Dibutyl sulfoxide<br>Dibutyl sulfone<br>IBA<br>Dodecane<br>EtOAc                                              | 10.5<br>14.2<br>14.8<br>2.7<br>11.8<br>3.3 |
| Column initial temp.: 323 K<br>Holding time: 8 min<br>Rate of heating: 10 K/min<br>Final temp.: 503 K<br>Final holding time: 5 min<br>Injection temp.: 523 K<br>Detector temp.: 523 K  | He<br>Inlet press.:<br>130 kPa | Tetrahydrothiophene<br>Tetrahydrothiophene 1-oxide<br>Sulfolane<br>IBA<br>Dodecane<br>EtOAc                                      | 7.0<br>17.2<br>18.5<br>2.1<br>18.2<br>2.9  |
| Column initial temp.: 323 K<br>Holding time: 3 min<br>Rate of heating: 10 K/min<br>Final temp.: 503 K<br>Final holding time: 5 min<br>Injection temp.: 523 K<br>Detector temp.: 523 K  | He<br>Inlet press.:<br>130 kPa | Diphenyl sulfide<br>Diphenyl sulfoxide<br>Diphenyl sulfone<br>IBA<br>Dodecane<br>EtOAc                                           | 19.1<br>22.9<br>23.6<br>2.1<br>13.1<br>2.5 |
| Column initial temp.: 323 K<br>Holding time: 3 min<br>Rate of heating: 15 K/min<br>Final temp.: 523 K<br>Final holding time: 5 min<br>Injection temp.: 573 K<br>Detector temp.: 573 K  | He<br>Inlet press.:<br>130 kPa | Phenyl <i>p</i> -tolyl sulfide<br>Phenyl <i>p</i> -tolyl sulfoxide<br>Phenyl <i>p</i> -tolyl sulfone<br>IBA<br>Dodecane<br>EtOAc | 16.1<br>18.8<br>19.4<br>2.1<br>10.9<br>2.5 |

Figure SI 1 Calibration curves of the standard compounds.

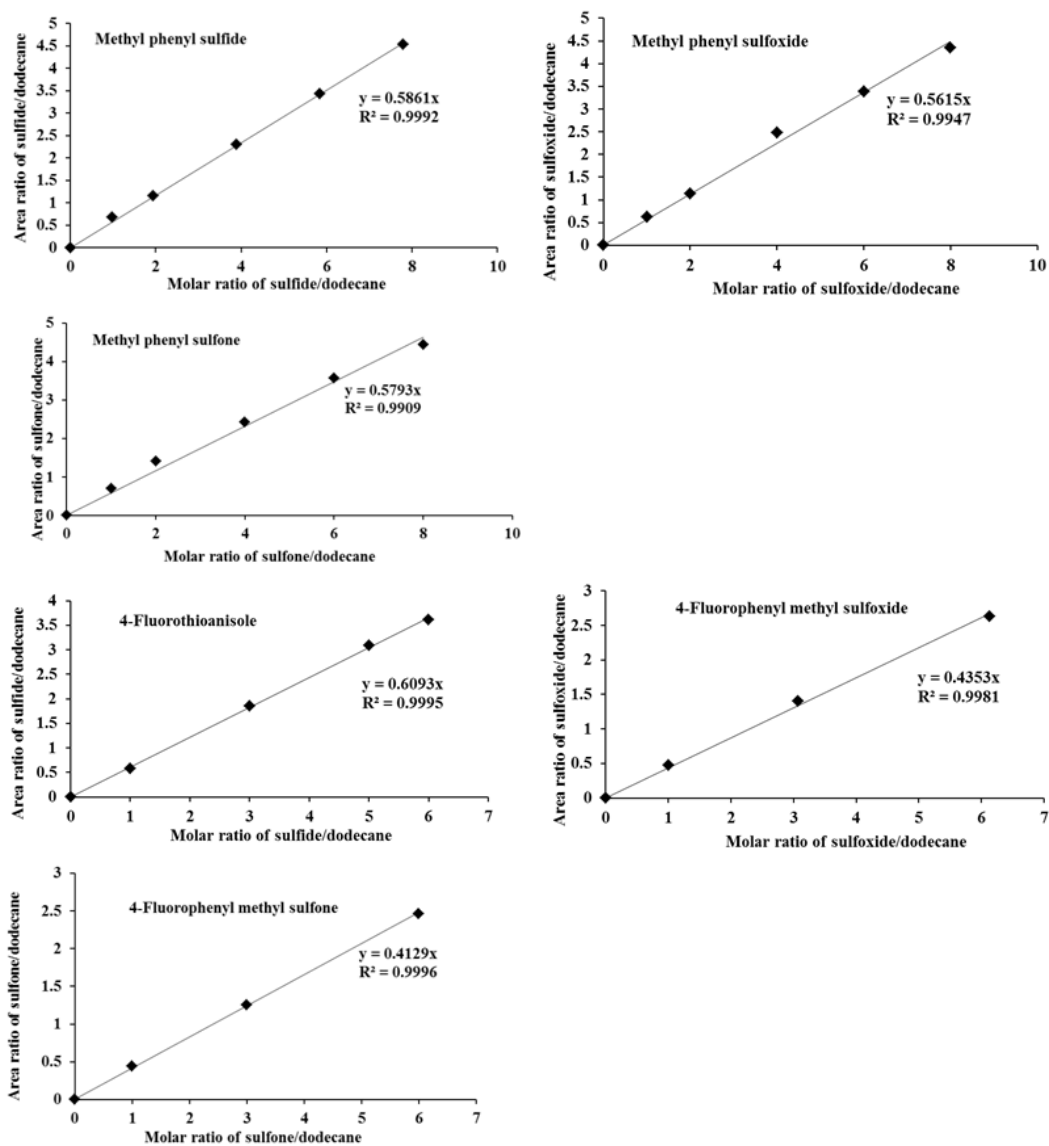

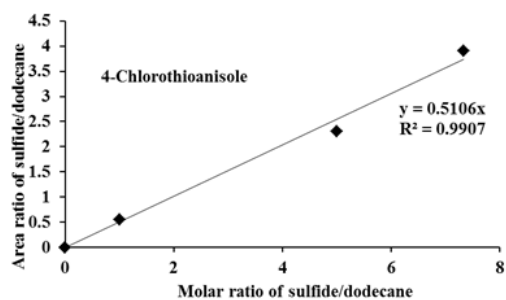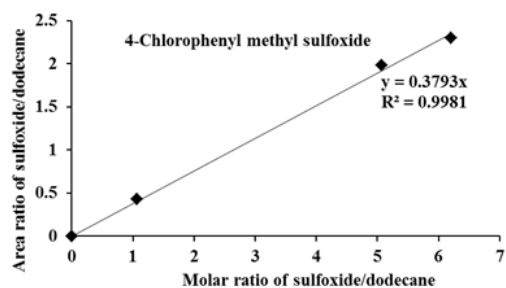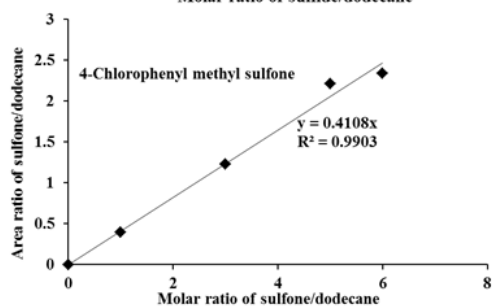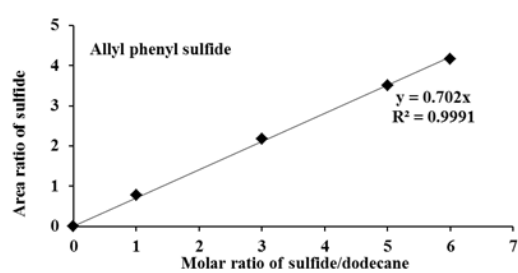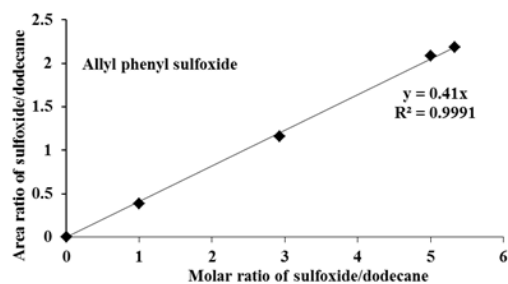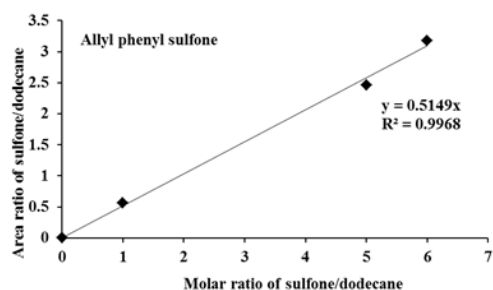

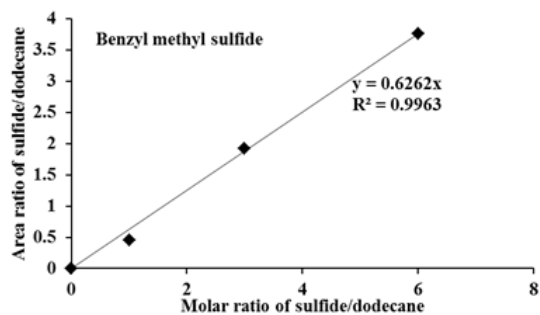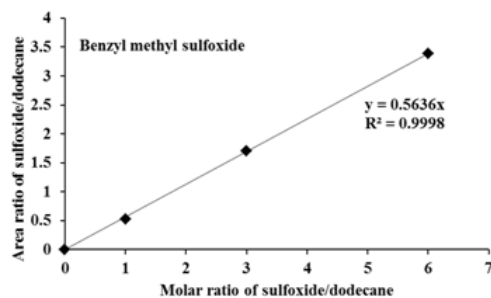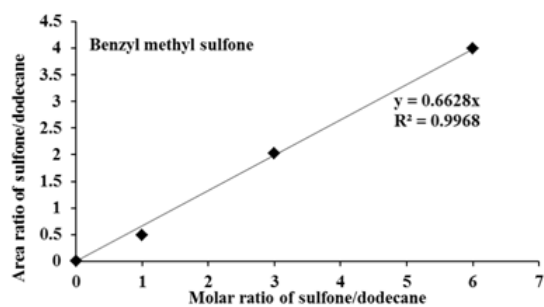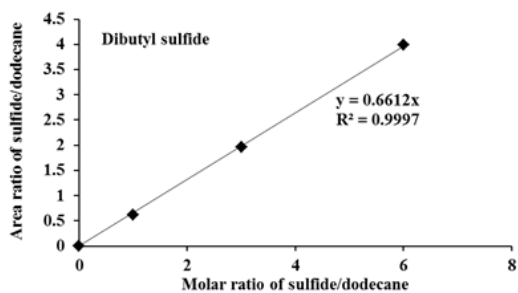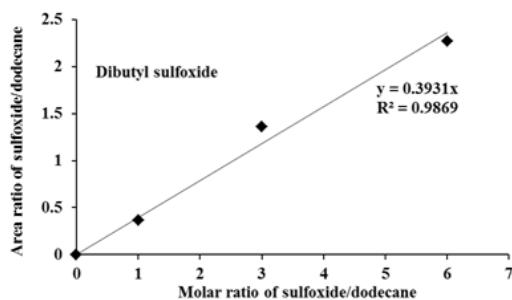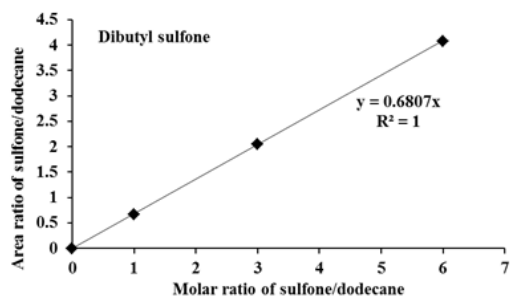

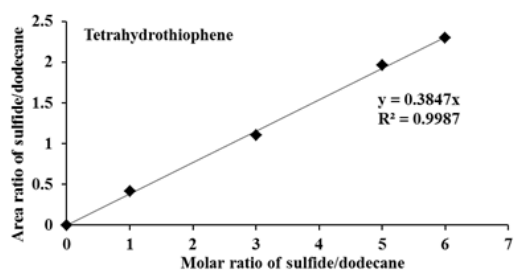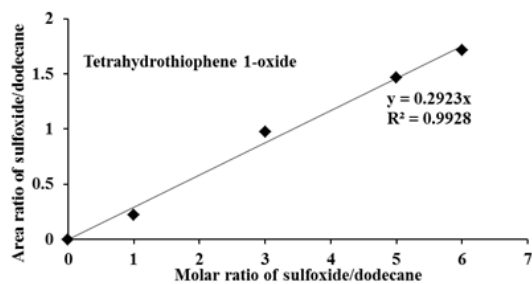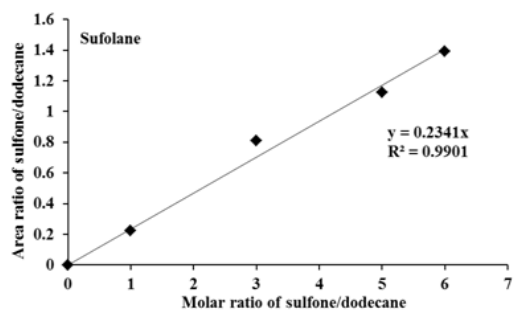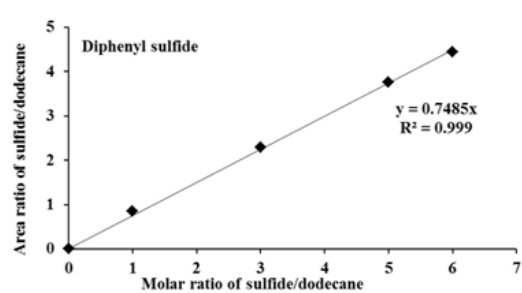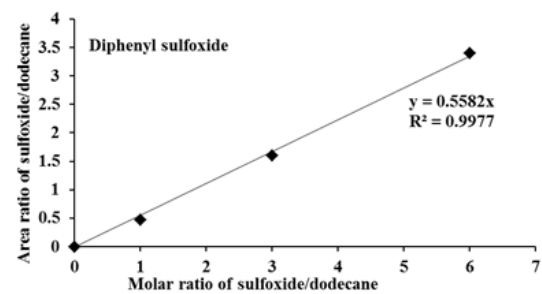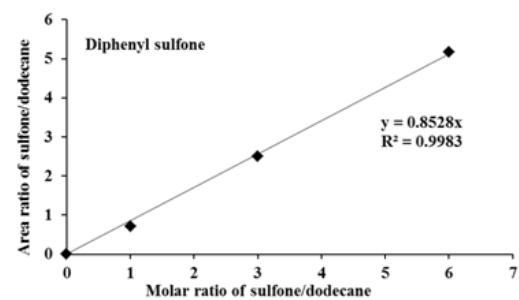



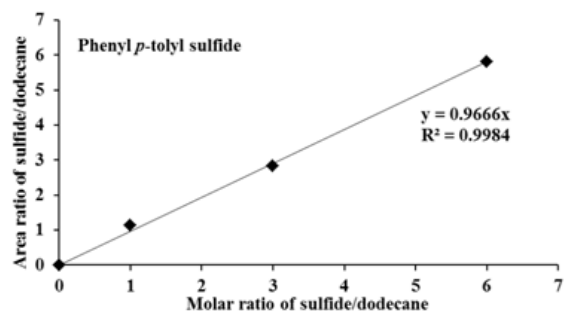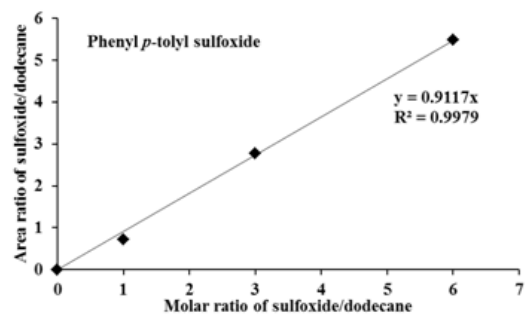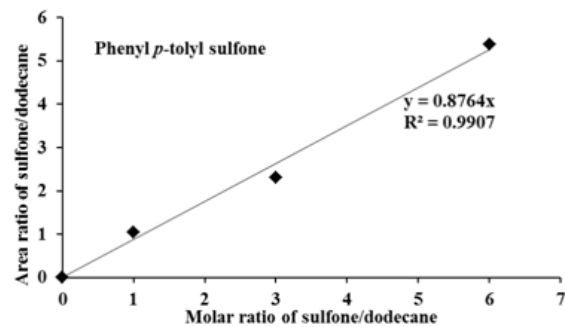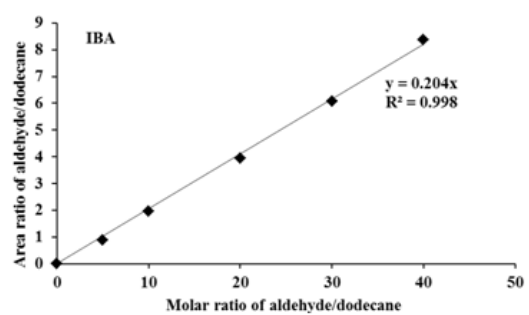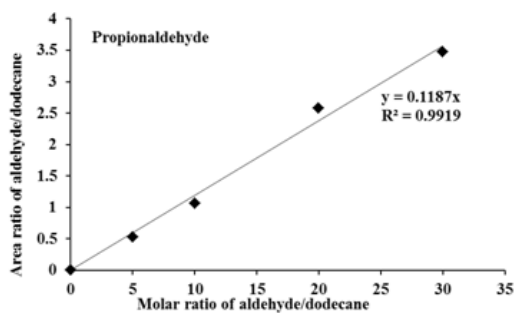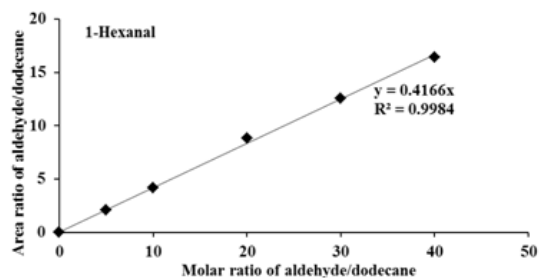

## Electronic Supplementary Information (ESI) 3

### Characterization

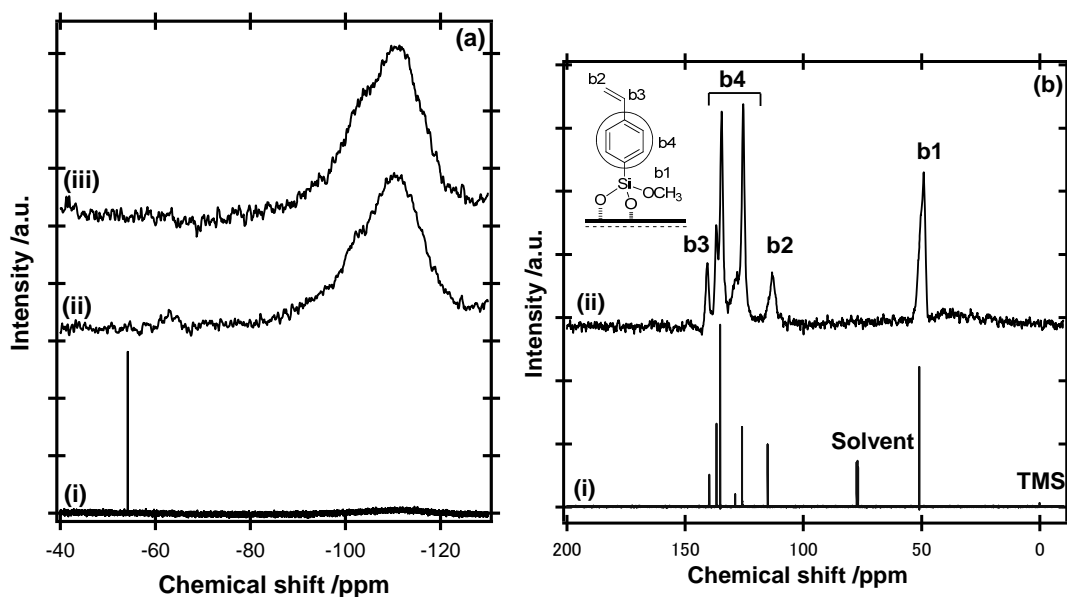

**Fig. SI 2** (a)  $^{29}\text{Si}$  NMR of (i)  $p$ -styryltrimethoxysilane (liquid-state NMR in  $\text{CDCl}_3$ ), (ii) functionalized  $\text{SiO}_2$  (Aerosil 300) with  $p$ -styryltrimethoxysilane (A) (solid-state MAS) and (iii)  $\text{SiO}_2$  (Aerosil 300) (solid-state MAS). (b)  $^{13}\text{C}$  NMR of (i)  $p$ -styryltrimethoxysilane (liquid-state NMR in  $\text{CDCl}_3$ ) and (ii) functionalized  $\text{SiO}_2$  (A) (solid-state MAS).

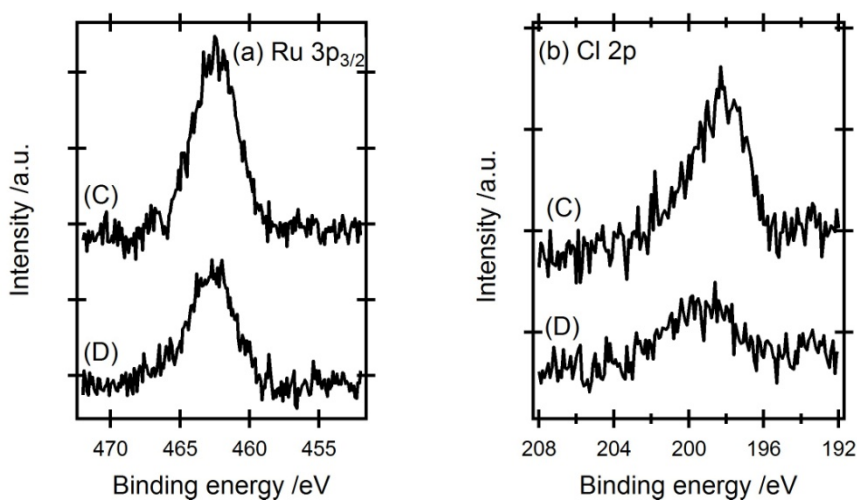

**Fig. SI 3** XPS spectra of fresh C and D (Ru 1.6 wt%). (a) Ru  $3p_{3/2}$  and (b) Cl  $2p$ .

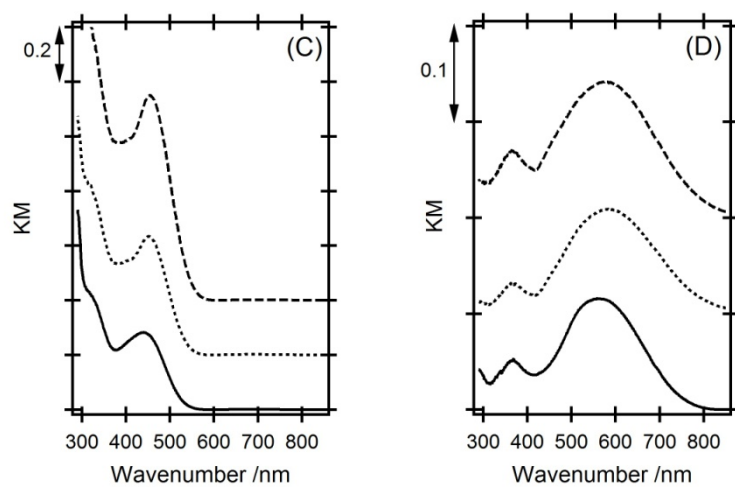

**Fig. SI 4** DR-UV/vis spectra of fresh **C** and **D**. Solid line: Ru 0.4 wt%, dotted line: Ru 1.0 wt%, and dashed line: Ru 1.6 wt%.

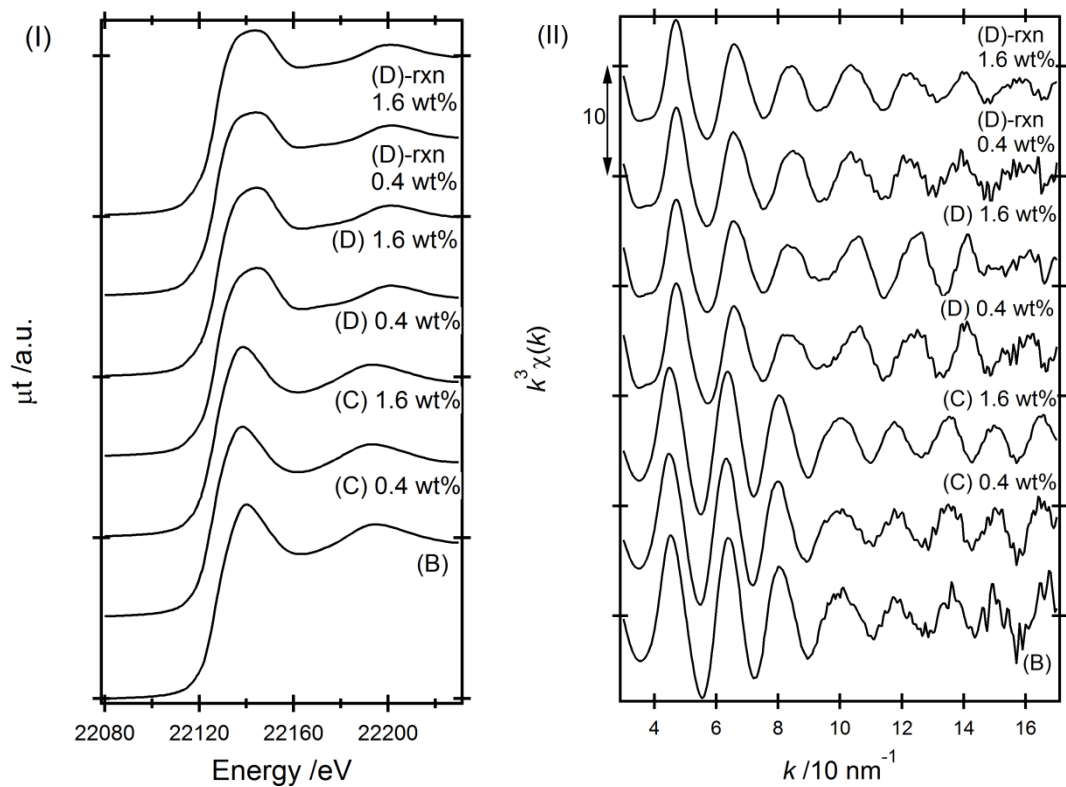

(III)

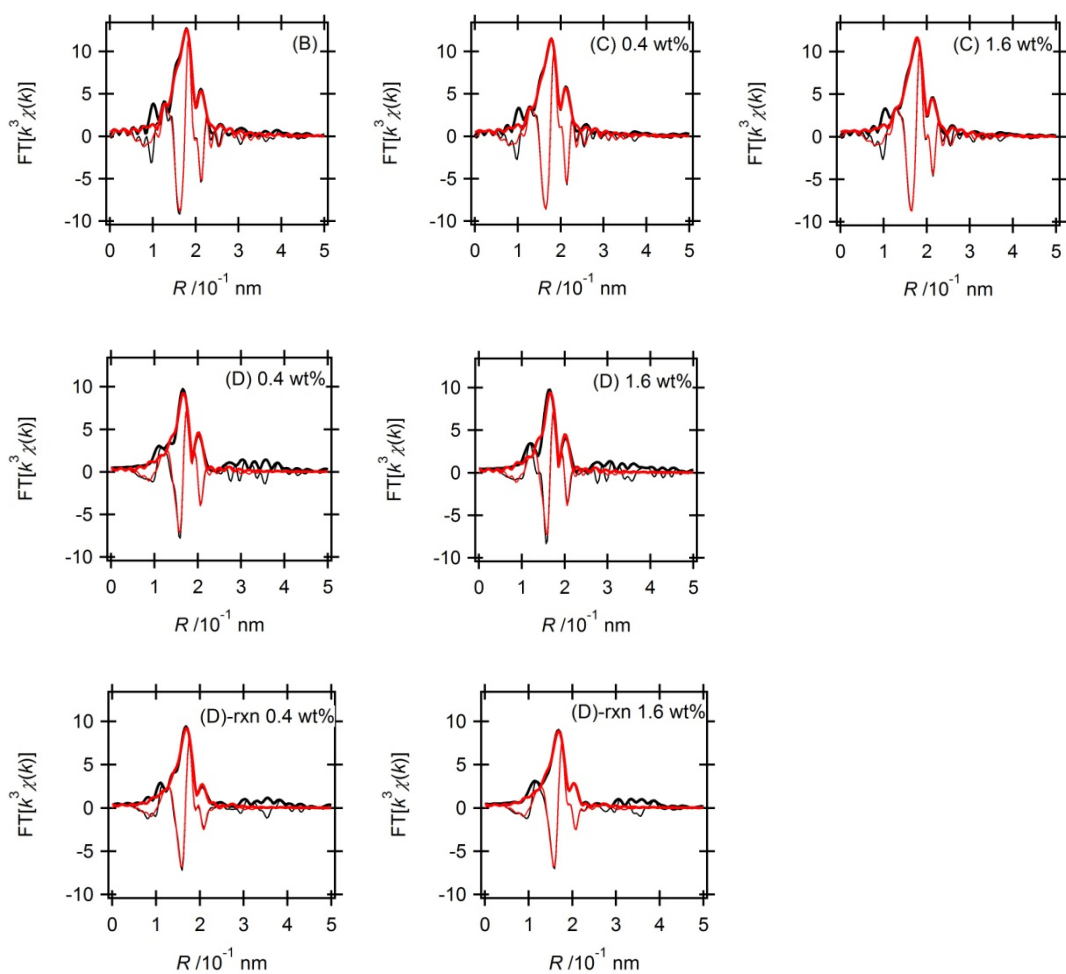

**Fig. SI 5** Ru K-edge XANES spectra (I), EXAFS oscillations (II), and their EXAFS Fourier transforms (III) of **B**, **C**, **D**, and **D-rxn** measured at 20 K.

**Table SI 2** Curve-fitting results of Ru K-edge EXAFS Fourier transforms of **C** and **D** (Ru 0.4 wt% and 1.6 wt%)

| Shell                                                                                                        | CN            | Distance /nm      | $\Delta E_0$ /eV | $\sigma^2$ /nm <sup>2</sup>    |
|--------------------------------------------------------------------------------------------------------------|---------------|-------------------|------------------|--------------------------------|
| <b>B</b> $k = 30\text{-}170 \text{ nm}^{-1}$ , $R = 0.115\text{-}0.25 \text{ nm}$ , $R_f = 1.0\%$            |               |                   |                  |                                |
| Ru-N                                                                                                         | 2.0           | $0.208 \pm 0.002$ | $8 \pm 5$        | $(0.7 \pm 2.3) \times 10^{-6}$ |
| Ru-C                                                                                                         | 6.0           | $0.219 \pm 0.002$ | $-1 \pm 3$       | $(1 \pm 1) \times 10^{-5}$     |
| Ru-Cl                                                                                                        | 1.0           | $0.242 \pm 0.003$ | $8 \pm 8$        | $(2 \pm 1) \times 10^{-5}$     |
| <b>B</b> $k = 30\text{-}170 \text{ nm}^{-1}$ , $R = 0.115\text{-}0.25 \text{ nm}$ , $R_f = 1.0\%$            |               |                   |                  |                                |
| Ru-N                                                                                                         | $1.9 \pm 1.0$ | $0.208 \pm 0.003$ | $8 \pm 10$       | $0.7 \times 10^{-6}$           |
| Ru-C                                                                                                         | $5.9 \pm 2.4$ | $0.219 \pm 0.002$ | $-1 \pm 6$       | $1 \times 10^{-5}$             |
| Ru-Cl                                                                                                        | $1.0 \pm 0.2$ | $0.242 \pm 0.003$ | $8 \pm 10$       | $2 \times 10^{-5}$             |
| <b>C 1.6 wt%</b> $k = 30\text{-}170 \text{ nm}^{-1}$ , $R = 0.115\text{-}0.25 \text{ nm}$ , $R_f = 0.5\%$    |               |                   |                  |                                |
| Ru-N                                                                                                         | $2.0 \pm 0.8$ | $0.210 \pm 0.002$ | $4 \pm 12$       | $0.7 \times 10^{-6}$           |
| Ru-C                                                                                                         | $4.5 \pm 1.5$ | $0.221 \pm 0.002$ | $2 \pm 9$        | $1 \times 10^{-5}$             |
| Ru-Cl                                                                                                        | $0.8 \pm 0.1$ | $0.245 \pm 0.002$ | $10 \pm 5$       | $2 \times 10^{-5}$             |
| <b>C 0.4 wt%</b> $k = 30\text{-}170 \text{ nm}^{-1}$ , $R = 0.115\text{-}0.25 \text{ nm}$ , $R_f = 0.6\%$    |               |                   |                  |                                |
| Ru-N                                                                                                         | $1.9 \pm 0.7$ | $0.210 \pm 0.002$ | $5 \pm 9$        | $0.7 \times 10^{-6}$           |
| Ru-C                                                                                                         | $4.8 \pm 1.7$ | $0.221 \pm 0.002$ | $0 \pm 6$        | $1 \times 10^{-5}$             |
| Ru-Cl                                                                                                        | $1.1 \pm 0.2$ | $0.244 \pm 0.002$ | $7 \pm 6$        | $2 \times 10^{-5}$             |
| <b>D 1.6 wt%</b> $k = 30\text{-}170 \text{ nm}^{-1}$ , $R = 0.13\text{-}0.24 \text{ nm}$ , $R_f = 1.1\%$     |               |                   |                  |                                |
| Ru-N                                                                                                         | $2.7 \pm 1.2$ | $0.206 \pm 0.002$ | $0 \pm 4$        | $(2 \pm 2) \times 10^{-5}$     |
| Ru-Cl                                                                                                        | $1.4 \pm 1.4$ | $0.235 \pm 0.006$ | $5 \pm 9$        | $(8 \pm 8) \times 10^{-5}$     |
| <b>D 0.4 wt%</b> $k = 30\text{-}170 \text{ nm}^{-1}$ , $R = 0.13\text{-}0.24 \text{ nm}$ , $R_f = 1.2\%$     |               |                   |                  |                                |
| Ru-N                                                                                                         | $3.0 \pm 1.1$ | $0.206 \pm 0.002$ | $2 \pm 4$        | $(2 \pm 2) \times 10^{-5}$     |
| Ru-Cl                                                                                                        | $1.3 \pm 1.2$ | $0.236 \pm 0.005$ | $6 \pm 8$        | $(7 \pm 8) \times 10^{-5}$     |
| <b>D-rxn 1.6 wt%</b> $k = 30\text{-}170 \text{ nm}^{-1}$ , $R = 0.13\text{-}0.24 \text{ nm}$ , $R_f = 0.3\%$ |               |                   |                  |                                |
| Ru-N                                                                                                         | $3.4 \pm 1.1$ | $0.208 \pm 0.002$ | $2 \pm 3$        | $(3 \pm 1) \times 10^{-5}$     |
| Ru-Cl                                                                                                        | $1.3 \pm 1.2$ | $0.235 \pm 0.007$ | $6 \pm 9$        | $(10 \pm 7) \times 10^{-5}$    |
| <b>D-rxn 0.4 wt%</b> $k = 30\text{-}170 \text{ nm}^{-1}$ , $R = 0.13\text{-}0.24 \text{ nm}$ , $R_f = 0.3\%$ |               |                   |                  |                                |
| Ru-N                                                                                                         | $3.7 \pm 0.7$ | $0.208 \pm 0.001$ | $2 \pm 3$        | $(3 \pm 1) \times 10^{-5}$     |
| Ru-Cl                                                                                                        | $1.4 \pm 1.2$ | $0.238 \pm 0.007$ | $10 \pm 9$       | $(13 \pm 8) \times 10^{-5}$    |

## Electronic Supplementary Information (ESI) 4

### Sulfoxidation

**Table SI 3** MPS oxidation with peracetic acid<sup>a</sup>

| Reactant                                                                          | No catalyst  |                         |                                    | Catalyst <b>D</b> |                         |                                    |
|-----------------------------------------------------------------------------------|--------------|-------------------------|------------------------------------|-------------------|-------------------------|------------------------------------|
|                                                                                   | Time<br>/min | Conv.<br>% <sup>b</sup> | MPSO<br>Selectivity % <sup>c</sup> | Time<br>/min      | Conv.<br>% <sup>b</sup> | MPSO<br>Selectivity % <sup>c</sup> |
| 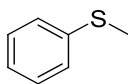 | 0            | 0                       | -                                  | 0                 | 0                       | -                                  |
|                                                                                   | 1            | 39                      | 97                                 | 1                 | 61                      | >99                                |
|                                                                                   | 3            | 52                      | >99                                | 3                 | 67                      | 98                                 |
|                                                                                   | 5            | 57                      | >99                                | 5                 | 70                      | 98                                 |

<sup>a</sup> Ru =  $1.5 \times 10^{-6}$  mol, MPS =  $1.5 \times 10^{-4}$  mol, CH<sub>3</sub>CO<sub>3</sub>H =  $1.5 \times 10^{-4}$  mol, dodecane =  $1.5 \times 10^{-4}$  mol, EtOAc 20 ml, 278 K. <sup>b</sup> MPS conversion % = (initial MPS – final MPS)/(initial MPS) × 100.

<sup>c</sup> MPSO selectivity % = produced MPSO/(produced MPSO + produced MPSO<sub>2</sub>) × 100.
